# Supplementary material for: Therapeutic effects of a Low FODMAP Diet on anxiety in irritable bowel syndrome patients
Source: Research Square preprint supplement (doi:10.21203/rs.3.rs-6469362/v1), 2025-05-07
Supplement: Supplementary file 1 [file 812c40046e471c99531f55cf.docx]

**Highlights**

1. **High Anxiety Prevalence in IBS Patients**: Approximately 60% of IBS patients exhibited anxiety, yet it was overlooked in conventional treatments, correlating with worse gastrointestinal symptom severity.
2. **Low FODMAP Diet Alleviates Dual Symptoms**: A 4-week low FODMAP diet significantly reduced both abdominal symptoms (IBS-SSS) and anxiety scores (HAMA), highlighting its dual therapeutic potential.
3. **Gut Microbiota Links to Diet Response**: Responders to the diet showed distinct gut microbiota profiles, including higher *Lactobacillus* and *Klebsiella*, suggesting microbial mechanisms underlying LFD efficacy.
